# Supplementary material for: Spin–orbit effects in square-planar Pt(ii) complexes with bidentate and terdentate ligands: theoretical absorption/emission spectroscopy
Source: Royal Society of Chemistry journal article supplement (doi:10.1039/c4dt01822b), 2014-01-01
Supplement: c4dt01822b1.pdf [file c4dt01822b1.pdf]

# Spin-Orbit Effects in Square-Planar Pt(II) Complexes with Bidentate and Terdentate Ligands: Theoretical Absorption/Emission Spectroscopy

Christophe Gourlaouen,<sup>a</sup> and Chantal Daniel<sup>a\*</sup>

Cartesian coordinates of the optimized geometries of the five complexes [Pt(bpy)Cl<sub>2</sub>] **1**, [Pt(ppy)Cl<sub>2</sub>] **2**, [Pt(tpy)Cl]<sup>+</sup> **3**, [Pt(phbpyR)Cl] **4** and [Pt(dpybR)Cl] **5** (R = CH<sub>3</sub>) in the electronic ground state

## Structure of **1**

|    |           |           |           |
|----|-----------|-----------|-----------|
| C  | 0.015869  | 1.716152  | 3.464381  |
| C  | 0.000611  | 2.976451  | 2.885945  |
| C  | 0.002303  | 1.923637  | 0.731437  |
| C  | 0.020704  | 0.598319  | 2.646901  |
| C  | 0.002303  | 1.923637  | -0.731437 |
| C  | 0.000611  | 2.976451  | -2.885945 |
| H  | -0.005599 | 3.868671  | -3.494940 |
| C  | 0.015869  | 1.716152  | -3.464381 |
| C  | 0.020704  | 0.598319  | -2.646901 |
| H  | 0.023304  | 1.587765  | 4.535309  |
| H  | -0.005599 | 3.868671  | 3.494940  |
| H  | 0.028940  | -0.403645 | 3.044053  |
| H  | 0.023304  | 1.587765  | -4.535309 |
| H  | 0.028940  | -0.403645 | -3.044053 |
| Pt | 0.000644  | -0.880236 | 0.000000  |
| N  | 0.012956  | 0.695206  | -1.310570 |
| N  | 0.012956  | 0.695206  | 1.310570  |
| C  | -0.006533 | 3.077131  | -1.504424 |
| H  | -0.017334 | 4.045604  | -1.033048 |
| C  | -0.006533 | 3.077131  | 1.504424  |
| H  | -0.017334 | 4.045604  | 1.033048  |
| Cl | -0.025544 | -2.560947 | -1.650675 |
| Cl | -0.025544 | -2.560947 | 1.650675  |

## Structure of **2**

|    |           |           |          |
|----|-----------|-----------|----------|
| C  | 1.718996  | -3.474781 | 0.000000 |
| C  | 2.985204  | -2.900284 | 0.000000 |
| C  | 1.945172  | -0.730710 | 0.000000 |
| C  | 0.609775  | -2.648550 | 0.000000 |
| C  | 1.920753  | 0.724896  | 0.000000 |
| C  | 2.989433  | 2.890694  | 0.000000 |
| H  | 3.886723  | 3.494837  | 0.000000 |
| C  | 1.729043  | 3.487143  | 0.000000 |
| C  | 0.570388  | 2.710837  | 0.000000 |
| H  | 1.584557  | -4.545315 | 0.000000 |
| H  | 3.873985  | -3.515724 | 0.000000 |
| H  | -0.396012 | -3.037063 | 0.000000 |
| H  | 1.649665  | 4.566498  | 0.000000 |
| H  | -0.390966 | 3.202518  | 0.000000 |
| Pt | -0.883774 | -0.007743 | 0.000000 |
| C  | 0.630675  | 1.312209  | 0.000000 |
| N  | 0.711810  | -1.310191 | 0.000000 |
| C  | 3.080915  | 1.507665  | 0.000000 |
| H  | 4.057488  | 1.044003  | 0.000000 |
| C  | 3.093278  | -1.521489 | 0.000000 |
| H  | 4.064514  | -1.052900 | 0.000000 |

|    |           |           |          |
|----|-----------|-----------|----------|
| Cl | -2.618173 | 1.609644  | 0.000000 |
| Cl | -2.644997 | -1.806193 | 0.000000 |

#### Structure of 3

|    |           |           |           |
|----|-----------|-----------|-----------|
| Pt | -0.008180 | 0.921410  | 0.000000  |
| Cl | -0.011612 | 3.279121  | 0.000000  |
| N  | -0.008597 | 0.575713  | -2.023176 |
| N  | -0.008597 | 0.575713  | 2.023176  |
| C  | -0.007155 | -1.672671 | 1.184710  |
| C  | -0.007597 | -3.060662 | 1.207092  |
| H  | -0.008182 | -3.598366 | 2.140536  |
| C  | -0.007759 | -3.748266 | 0.000000  |
| C  | -0.007597 | -3.060662 | -1.207092 |
| H  | -0.008182 | -3.598366 | -2.140536 |
| C  | -0.007155 | -1.672671 | -1.184710 |
| C  | -0.008304 | -0.756676 | -2.333697 |
| C  | -0.010404 | -1.176584 | -3.651549 |
| H  | -0.010563 | -2.229522 | -3.881879 |
| C  | -0.012238 | -0.231808 | -4.669666 |
| H  | -0.013719 | -0.550174 | -5.701538 |
| C  | -0.012162 | 1.113806  | -4.340676 |
| H  | -0.013549 | 1.879778  | -5.099700 |
| C  | -0.010352 | 1.482511  | -3.003119 |
| H  | -0.010372 | 2.514300  | -2.689271 |
| C  | -0.010352 | 1.482511  | 3.003119  |
| H  | -0.010372 | 2.514300  | 2.689271  |
| C  | -0.012162 | 1.113806  | 4.340676  |
| H  | -0.013549 | 1.879778  | 5.099700  |
| C  | -0.012238 | -0.231808 | 4.669666  |
| H  | -0.013719 | -0.550174 | 5.701538  |
| C  | -0.010404 | -1.176584 | 3.651549  |
| H  | -0.010563 | -2.229522 | 3.881879  |
| C  | -0.008304 | -0.756676 | 2.333697  |
| H  | -0.008388 | -4.827768 | 0.000000  |
| N  | -0.006575 | -1.039109 | 0.000000  |

#### Structure of 4

|    |           |           |           |
|----|-----------|-----------|-----------|
| Pt | -0.008706 | 0.979849  | -0.041700 |
| Cl | -0.010508 | 3.346390  | -0.008642 |
| N  | -0.008869 | 0.586419  | 2.086218  |
| C  | -0.008137 | -1.638227 | 1.184038  |
| C  | -0.007599 | -3.026168 | 1.217354  |
| H  | -0.007527 | -3.556256 | 2.154956  |
| C  | -0.007286 | -3.725468 | 0.015744  |
| C  | -0.007773 | -3.044719 | -1.191407 |
| H  | -0.007889 | -3.586821 | -2.123243 |
| C  | -0.008239 | -1.651482 | -1.189177 |
| C  | -0.009152 | -0.743695 | -2.335500 |
| C  | -0.010776 | -1.192799 | -3.657246 |
| H  | -0.011109 | -2.251432 | -3.876971 |
| C  | -0.011973 | -0.278413 | -4.701856 |
| H  | -0.013222 | -0.626761 | -5.725209 |
| C  | -0.011635 | 1.085284  | -4.418001 |
| H  | -0.012514 | 1.800160  | -5.229968 |
| C  | -0.010368 | 1.540591  | -3.098295 |
| H  | -0.010385 | 2.604144  | -2.905833 |
| C  | -0.009830 | 1.463292  | 3.090830  |
| H  | -0.009418 | 2.504423  | 2.802955  |
| C  | -0.011410 | 1.066129  | 4.419631  |
| H  | -0.012162 | 1.810167  | 5.200470  |
| C  | -0.012226 | -0.290418 | 4.709394  |
| H  | -0.013747 | -0.637278 | 5.732264  |
| C  | -0.011134 | -1.205751 | 3.666163  |
| H  | -0.011856 | -2.263845 | 3.870871  |
| C  | -0.009189 | -0.744348 | 2.357222  |

|   |           |           |           |
|---|-----------|-----------|-----------|
| H | -0.006884 | -4.805511 | 0.024312  |
| N | -0.008076 | -1.001715 | -0.003156 |
| C | -0.009303 | 0.648938  | -2.026220 |

Structure of **5**

|    |           |           |           |
|----|-----------|-----------|-----------|
| Pt | -0.004448 | 0.925233  | 0.000000  |
| Cl | -0.006621 | 3.423409  | 0.000000  |
| N  | -0.006520 | 0.553771  | -2.042221 |
| N  | -0.006520 | 0.553771  | 2.042221  |
| C  | -0.005111 | -1.684879 | 1.216637  |
| C  | -0.006634 | -3.082480 | 1.209001  |
| H  | -0.011818 | -3.640036 | 2.136127  |
| C  | -0.004190 | -3.790085 | 0.000000  |
| C  | -0.006634 | -3.082480 | -1.209001 |
| H  | -0.011818 | -3.640036 | -2.136127 |
| C  | -0.005111 | -1.684879 | -1.216637 |
| C  | -0.009547 | -0.781383 | -2.368187 |
| C  | -0.016389 | -1.173646 | -3.700317 |
| H  | -0.019956 | -2.224937 | -3.943540 |
| C  | -0.018044 | -0.216594 | -4.703055 |
| H  | -0.023194 | -0.519351 | -5.740411 |
| C  | -0.012751 | 1.128384  | -4.356294 |
| H  | -0.013145 | 1.904679  | -5.105253 |
| C  | -0.007411 | 1.472878  | -3.014653 |
| H  | -0.004262 | 2.500569  | -2.685102 |
| C  | -0.007411 | 1.472878  | 3.014653  |
| H  | -0.004262 | 2.500569  | 2.685102  |
| C  | -0.012751 | 1.128384  | 4.356294  |
| H  | -0.013145 | 1.904679  | 5.105253  |
| C  | -0.018044 | -0.216594 | 4.703055  |
| H  | -0.023194 | -0.519351 | 5.740411  |
| C  | -0.016389 | -1.173646 | 3.700317  |
| H  | -0.019956 | -2.224937 | 3.943540  |
| C  | -0.009547 | -0.781383 | 2.368187  |
| C  | -0.002503 | -1.007983 | 0.000000  |
| C  | 0.027736  | -5.300279 | 0.000000  |
| H  | -0.465467 | -5.707206 | 0.881643  |
| H  | 1.055906  | -5.670117 | 0.000000  |
| H  | -0.465467 | -5.707206 | -0.881643 |

**Table S1.** TD-DFT/B3LYP (without SOC) transition energies (in eV) to the low-lying singlet and triplet excited states of [Pt(bpy)Cl<sub>2</sub>] **1** and [Pt(tpy)Cl]<sup>+</sup> **3** and associated oscillator strengths *f*.

|                                    | Singlet transition energies | <i>f</i> | Triplet transition energies |
|------------------------------------|-----------------------------|----------|-----------------------------|
| [Pt(bpy)Cl <sub>2</sub> ] <b>1</b> | 3.13                        | 0.003367 | 2.81                        |
|                                    | 3.34                        | 0.004277 | 2.86                        |
|                                    | 3.40                        | 0.176000 | 2.98                        |
|                                    | 3.40                        | 0.001137 | 3.00                        |
|                                    | 3.53                        | 0.000240 | 3.05                        |
|                                    | 3.53                        | 0.001389 | 3.22                        |
|                                    | 3.56                        | 0.000036 | 3.28                        |
|                                    | 3.61                        | 0.001135 | 3.31                        |
|                                    | 4.02                        | 0.403000 | 3.47                        |
|                                    | 4.10                        | 0.000688 | 3.95                        |
|                                    | 4.24                        | 0.284000 | 4.03                        |
|                                    | 4.36                        | 0.000255 | 4.09                        |

[Pt(tpy)Cl]<sup>+</sup> **3**

|      |          |      |
|------|----------|------|
| 4.47 | 0.013550 | 4.10 |
| 4.47 | 0.171000 | 4.22 |
| 4.57 | 0.314100 | 4.35 |
| 4.57 | 0.000042 | 4.38 |
| 4.63 | 0.015380 | 4.44 |
| 4.63 | 0.000257 | 4.47 |
| 4.75 | 0.000118 | 4.52 |
| 4.85 | 0.000125 | 4.56 |
| 4.90 | 0.005373 | 4.61 |
| 5.12 | 0.049880 | 4.62 |
| 5.13 | 0.009014 | 4.73 |
| 5.18 | 0.017930 | 4.83 |
| 5.33 | 0.000320 | 4.88 |
| 5.37 | 0.000272 | 5.09 |
| 5.38 | 0.000002 | 5.12 |
| 5.39 | 0.187700 | 5.26 |
| 5.55 | 0.015910 | 5.30 |
| 5.62 | 0.000108 | 5.31 |
| 5.72 | 0.000046 | 5.41 |
| 5.83 | 0.019520 | 5.44 |
| 5.87 | 0.004438 | 5.48 |
| 5.87 | 0.001697 | 5.49 |
| 5.98 | 0.002975 | 5.55 |
| 5.99 | 0.155400 | 5.59 |
| 6.01 | 0.000007 | 5.72 |
| 6.06 | 0.450300 | 5.76 |
| 6.13 | 0.000006 | 5.77 |
| 6.14 | 0.062660 | 5.80 |
| 3.24 | 0.075550 | 2.78 |
| 3.35 | 0.020200 | 2.93 |
| 3.35 | 0.008036 | 3.12 |
| 3.44 | 0.000001 | 3.25 |
| 3.60 | 0.024890 | 3.39 |
| 3.80 | 0.712400 | 3.39 |
| 3.90 | 0.000001 | 3.40 |
| 3.93 | 0.000002 | 3.51 |
| 3.99 | 0.172400 | 3.54 |
| 3.99 | 0.001062 | 3.65 |
| 4.07 | 0.080320 | 3.75 |
| 4.15 | 0.045870 | 3.88 |
| 4.26 | 0.000003 | 3.89 |
| 4.30 | 0.235600 | 3.95 |
| 4.58 | 0.043250 | 3.97 |
| 4.60 | 0.006322 | 4.11 |
| 4.64 | 0.154100 | 4.19 |

|      |          |      |
|------|----------|------|
| 4.85 | 0.138100 | 4.29 |
| 4.88 | 0.000192 | 4.40 |
| 4.90 | 0.000838 | 4.51 |
| 4.92 | 0.000659 | 4.57 |
| 4.93 | 0.000016 | 4.68 |
| 4.94 | 0.011620 | 4.69 |
| 4.96 | 0.740800 | 4.85 |
| 4.98 | 0.083800 | 4.87 |
| 4.99 | 0.000094 | 4.88 |
| 5.14 | 0.000000 | 4.90 |
| 5.32 | 0.000366 | 4.91 |
| 5.32 | 0.073900 | 4.94 |
| 5.35 | 0.001303 | 4.95 |
| 5.36 | 0.070650 | 5.03 |
| 5.44 | 0.174900 | 5.04 |
| 5.46 | 0.007046 | 5.18 |
| 5.60 | 0.008009 | 5.20 |
| 5.62 | 0.000085 | 5.26 |
| 5.70 | 0.000079 | 5.31 |
| 5.71 | 0.000252 | 5.41 |
| 5.72 | 0.013940 | 5.44 |
| 5.75 | 0.000000 | 5.54 |
| 5.81 | 0.022680 | 5.56 |

**Table S2.** TD-DFT/B3LYP (without SOC) transition energies (in eV) to the low-lying singlet and triplet excited states of [Pt(ppy)Cl<sub>2</sub>]- **2**, [Pt(phbpyR)Cl] **4** and [Pt(dpybR)Cl] **5** (R = CH<sub>3</sub>) and associated oscillator strengths f (allowed transitions by symmetry only: A' and A'').

|                                     | Singlet transition energies | f        | Triplet transition energies |
|-------------------------------------|-----------------------------|----------|-----------------------------|
| [Pt(ppy)Cl <sub>2</sub> ]- <b>2</b> | 3.13                        | 0.036740 | 2.76                        |
|                                     | 3.49                        | 0.011200 | 3.18                        |
|                                     | 3.59                        | 0.188700 | 3.27                        |
|                                     | 3.70                        | 0.000176 | 3.39                        |
|                                     | 3.80                        | 0.000369 | 3.44                        |
|                                     | 3.85                        | 0.056490 | 3.48                        |
|                                     | 3.98                        | 0.018440 | 3.49                        |
|                                     | 4.04                        | 0.001125 | 3.57                        |
|                                     | 4.08                        | 0.264000 | 3.69                        |
|                                     | 4.12                        | 0.163400 | 3.72                        |
|                                     | 4.26                        | 0.028800 | 3.93                        |
|                                     | 4.28                        | 0.309500 | 4.00                        |
|                                     | 4.44                        | 0.000109 | 4.24                        |
|                                     | 4.49                        | 0.000011 | 4.24                        |
|                                     | 4.65                        | 0.020760 | 4.40                        |

[Pt(phbpyR)Cl] **4**

|      |          |      |
|------|----------|------|
| 4.79 | 0.049390 | 4.42 |
| 4.90 | 0.007532 | 4.48 |
| 4.91 | 0.482200 | 4.61 |
| 5.08 | 0.000076 | 4.79 |
| 5.11 | 0.000610 | 4.84 |
| 5.13 | 0.113200 | 4.95 |
| 5.16 | 0.033730 | 5.00 |
| 5.29 | 0.073590 | 5.03 |
| 5.32 | 0.024210 | 5.05 |
| 5.37 | 0.000677 | 5.10 |
| 5.40 | 0.019400 | 5.12 |
| 5.57 | 0.002497 | 5.25 |
| 5.57 | 0.023040 | 5.29 |
| 5.61 | 0.000182 | 5.33 |
| 5.65 | 0.016570 | 5.39 |
| 5.67 | 0.000083 | 5.43 |
| 5.70 | 0.086260 | 5.44 |
| 5.84 | 0.088140 | 5.56 |
| 5.85 | 0.424100 | 5.58 |
| 5.94 | 0.001174 | 5.62 |
| 5.97 | 0.230200 | 5.66 |
| 6.00 | 0.016140 | 5.68 |
| 6.01 | 0.017640 | 5.78 |
| 6.02 | 0.006294 | 5.83 |
| 6.10 | 0.097160 | 5.89 |
| 2.77 | 0.004346 | 2.54 |
| 3.12 | 0.005125 | 2.72 |
| 3.16 | 0.056850 | 2.92 |
| 3.23 | 0.003563 | 3.02 |
| 3.43 | 0.195800 | 3.15 |
| 3.61 | 0.350200 | 3.25 |
| 3.73 | 0.207500 | 3.47 |
| 3.77 | 0.002502 | 3.62 |
| 3.92 | 0.001850 | 3.74 |
| 4.10 | 0.197100 | 3.80 |
| 4.22 | 0.235400 | 3.81 |
| 4.26 | 0.000057 | 3.89 |
| 4.33 | 0.095570 | 3.89 |
| 4.37 | 0.000016 | 3.92 |
| 4.41 | 0.071980 | 3.99 |
| 4.44 | 0.000282 | 4.01 |
| 4.45 | 0.115400 | 4.04 |
| 4.49 | 0.352800 | 4.11 |
| 4.51 | 0.000346 | 4.29 |
| 4.54 | 0.019110 | 4.34 |

|                           |      |          |      |
|---------------------------|------|----------|------|
|                           | 4.68 | 0.000019 | 4.36 |
|                           | 4.87 | 0.160700 | 4.40 |
|                           | 4.89 | 0.025950 | 4.47 |
|                           | 5.03 | 0.160800 | 4.59 |
|                           | 5.12 | 0.020230 | 4.61 |
|                           | 5.14 | 0.017090 | 4.67 |
|                           | 5.23 | 0.001706 | 4.84 |
|                           | 5.24 | 0.032920 | 4.87 |
|                           | 5.27 | 0.004475 | 4.99 |
|                           | 5.27 | 0.434100 | 5.05 |
|                           | 5.33 | 0.000074 | 5.13 |
|                           | 5.36 | 0.000001 | 5.16 |
|                           | 5.42 | 0.130800 | 5.18 |
|                           | 5.43 | 0.005331 | 5.19 |
|                           | 5.45 | 0.004434 | 5.25 |
|                           | 5.48 | 0.019010 | 5.30 |
|                           | 5.49 | 0.008696 | 5.31 |
|                           | 5.62 | 0.011770 | 5.34 |
|                           | 5.67 | 0.061700 | 5.35 |
|                           | 5.70 | 0.136700 | 5.40 |
| [Pt(dpybR)Cl] <b>5</b> (R |      |          |      |
| = CH <sub>3</sub> )       | 3.17 | 0.003264 | 2.68 |
|                           | 3.20 | 0.099080 | 2.76 |
|                           | 3.61 | 0.005118 | 3.04 |
|                           | 3.61 | 0.005321 | 3.25 |
|                           | 3.70 | 0.000000 | 3.40 |
|                           | 3.76 | 0.000000 | 3.61 |
|                           | 3.91 | 0.000660 | 3.67 |
|                           | 3.92 | 0.043080 | 3.71 |
|                           | 3.95 | 0.000121 | 3.78 |
|                           | 4.21 | 0.240400 | 3.84 |
|                           | 4.28 | 0.015640 | 3.88 |
|                           | 4.33 | 0.107500 | 3.88 |
|                           | 4.35 | 0.000324 | 3.98 |
|                           | 4.50 | 0.000001 | 4.06 |
|                           | 4.55 | 0.048460 | 4.17 |
|                           | 4.55 | 0.015200 | 4.20 |
|                           | 4.64 | 0.011690 | 4.27 |
|                           | 4.67 | 0.000049 | 4.31 |
|                           | 4.76 | 0.003277 | 4.38 |
|                           | 4.81 | 0.000775 | 4.38 |
|                           | 4.83 | 0.028340 | 4.43 |
|                           | 4.87 | 0.000104 | 4.43 |
|                           | 4.90 | 0.000477 | 4.47 |
|                           | 4.93 | 0.353600 | 4.62 |

|      |          |      |
|------|----------|------|
| 4.95 | 0.000196 | 4.63 |
| 4.97 | 0.000016 | 4.72 |
| 5.09 | 0.008831 | 4.77 |
| 5.18 | 0.000012 | 4.82 |
| 5.20 | 0.018190 | 4.82 |
| 5.20 | 0.099720 | 4.93 |
| 5.28 | 0.000032 | 4.95 |
| 5.30 | 0.065520 | 5.06 |
| 5.38 | 0.108900 | 5.09 |
| 5.50 | 0.373800 | 5.14 |
| 5.56 | 0.011210 | 5.20 |
| 5.59 | 0.003514 | 5.24 |
| 5.60 | 0.000053 | 5.27 |
| 5.69 | 0.063100 | 5.35 |
| 5.72 | 0.000108 | 5.35 |
| 5.76 | 0.022010 | 5.45 |

**Table S3.** TD-DFT/B3LYP transition energies (in eV) to the low-lying SO excited states of [Pt(bpy)Cl<sub>2</sub>] **1** and [Pt(tpy)Cl]<sup>+</sup> **3** and associated oscillator strengths f.

|                                    | transition energies | f        |
|------------------------------------|---------------------|----------|
| [Pt(bpy)Cl <sub>2</sub> ] <b>1</b> | 2.43                | 0.000000 |
|                                    | 2.43                | 0.000025 |
|                                    | 2.54                | 0.000274 |
|                                    | 2.54                | 0.000109 |
|                                    | 2.56                | 0.001555 |
|                                    | 2.66                | 0.000624 |
|                                    | 2.69                | 0.000001 |
|                                    | 2.70                | 0.000406 |
|                                    | 2.72                | 0.000683 |
|                                    | 2.76                | 0.000002 |
|                                    | 2.81                | 0.001191 |
|                                    | 2.82                | 0.000792 |
|                                    | 2.85                | 0.000616 |
|                                    | 2.88                | 0.001481 |
|                                    | 2.90                | 0.000011 |
|                                    | 2.99                | 0.076480 |



|  |      |          |
|--|------|----------|
|  | 3.19 | 0.000000 |
|  | 3.20 | 0.000579 |
|  | 3.20 | 0.008916 |
|  | 3.34 | 0.001382 |
|  | 3.36 | 0.000002 |
|  | 3.39 | 0.000145 |
|  | 3.53 | 0.000395 |
|  | 3.55 | 0.000012 |
|  | 3.58 | 0.000782 |
|  | 3.58 | 0.000639 |
|  | 3.59 | 0.014580 |
|  | 3.67 | 0.003031 |
|  | 3.67 | 0.000078 |
|  | 3.69 | 0.001410 |
|  | 3.70 | 0.001971 |
|  | 3.78 | 0.070270 |
|  | 3.78 | 0.001771 |
|  | 3.84 | 0.000270 |
|  | 3.84 | 0.014570 |
|  | 3.86 | 0.000056 |
|  | 3.86 | 0.000033 |
|  | 3.86 | 0.022410 |
|  | 3.87 | 0.000970 |
|  | 3.88 | 0.000077 |
|  | 3.88 | 0.004010 |
|  | 3.93 | 0.240900 |
|  | 3.93 | 0.000352 |
|  | 3.94 | 0.000187 |
|  | 3.94 | 0.004114 |
|  | 4.04 | 0.009674 |
|  | 4.05 | 0.000665 |
|  | 4.05 | 0.000459 |
|  | 4.06 | 0.001349 |

|  |      |          |
|--|------|----------|
|  | 4.07 | 0.250200 |
|  | 4.08 | 0.000010 |
|  | 4.08 | 0.037480 |
|  | 4.09 | 0.001662 |
|  | 4.10 | 0.006391 |
|  | 4.18 | 0.075060 |
|  | 4.23 | 0.000613 |
|  | 4.23 | 0.000518 |
|  | 4.24 | 0.024260 |
|  | 4.25 | 0.188700 |
|  | 4.36 | 0.000003 |
|  | 4.36 | 0.000062 |
|  | 4.36 | 0.000222 |
|  | 4.36 | 0.000155 |
|  | 4.36 | 0.001908 |
|  | 4.36 | 0.005769 |
|  | 4.47 | 0.000025 |
|  | 4.47 | 0.000408 |
|  | 4.47 | 0.002917 |
|  | 4.50 | 0.002004 |
|  | 4.50 | 0.000080 |
|  | 4.51 | 0.000069 |
|  | 4.63 | 0.015860 |
|  | 4.65 | 0.000090 |
|  | 4.65 | 0.025580 |
|  | 4.65 | 0.001828 |
|  | 4.66 | 0.000052 |
|  | 4.78 | 0.013970 |
|  | 4.78 | 0.001193 |
|  | 4.79 | 0.000064 |
|  | 4.82 | 0.011170 |
|  | 4.83 | 0.001273 |
|  | 4.83 | 0.002248 |

|  |      |          |
|--|------|----------|
|  | 4.83 | 0.001106 |
|  | 4.84 | 0.047230 |
|  | 4.86 | 0.000308 |
|  | 4.86 | 0.000171 |
|  | 4.87 | 0.000238 |
|  | 4.88 | 0.000046 |
|  | 4.88 | 0.026990 |
|  | 4.89 | 0.009901 |
|  | 4.89 | 0.004511 |
|  | 4.91 | 0.014770 |
|  | 5.01 | 0.036620 |
|  | 5.04 | 0.000020 |
|  | 5.05 | 0.000233 |
|  | 5.08 | 0.078940 |
|  | 5.10 | 0.001318 |
|  | 5.10 | 0.017530 |
|  | 5.11 | 0.000021 |
|  | 5.12 | 0.001098 |
|  | 5.12 | 0.000009 |
|  | 5.12 | 0.001533 |
|  | 5.13 | 0.017320 |
|  | 5.15 | 0.028530 |
|  | 5.20 | 0.019240 |
|  | 5.24 | 0.005444 |
|  | 5.24 | 0.004944 |
|  | 5.25 | 0.000626 |
|  | 5.26 | 0.001691 |
|  | 5.28 | 0.000015 |
|  | 5.29 | 0.034070 |
|  | 5.32 | 0.001888 |
|  | 5.33 | 0.012540 |
|  | 5.33 | 0.000014 |
|  | 5.33 | 0.002297 |

|  |      |          |
|--|------|----------|
|  | 5.33 | 0.000002 |
|  | 5.37 | 0.000273 |
|  | 5.41 | 0.000582 |
|  | 5.42 | 0.064040 |
|  | 5.45 | 0.000240 |
|  | 5.46 | 0.000062 |
|  | 5.47 | 0.000023 |
|  | 5.48 | 0.000333 |
|  | 5.48 | 0.000054 |
|  | 5.49 | 0.035300 |
|  | 5.49 | 0.000031 |
|  | 5.50 | 0.003183 |
|  | 5.50 | 0.000050 |
|  | 5.51 | 0.011090 |
|  | 5.52 | 0.020590 |
|  | 5.52 | 0.000008 |
|  | 5.54 | 0.012870 |
|  | 5.56 | 0.000005 |
|  | 5.56 | 0.000028 |
|  | 5.57 | 0.001061 |
|  | 5.58 | 0.000016 |
|  | 5.58 | 0.000012 |
|  | 5.59 | 0.000070 |
|  | 5.63 | 0.000103 |
|  | 5.66 | 0.000004 |
|  | 5.68 | 0.000034 |
|  | 5.69 | 0.006479 |
|  | 5.70 | 0.013610 |
|  | 5.72 | 0.000011 |
|  | 5.72 | 0.000742 |
|  | 5.73 | 0.000075 |
|  | 5.77 | 0.000033 |
|  | 5.78 | 0.005099 |

|                            |      |          |
|----------------------------|------|----------|
|                            | 5.79 | 0.000003 |
|                            | 5.80 | 0.000055 |
|                            | 5.90 | 0.003764 |
|                            | 5.93 | 0.000053 |
|                            | 5.96 | 0.021510 |
|                            | 5.96 | 0.013870 |
|                            | 6.03 | 0.002938 |
|                            | 6.04 | 0.125900 |
|                            | 6.09 | 0.434500 |
|                            | 6.17 | 0.061560 |
|                            | 6.21 | 0.000005 |
|                            | 6.41 | 0.000027 |
| [Pt(tpy)Cl] <sup>+</sup> 3 | 2.61 | 0.000479 |
|                            | 2.61 | 0.000000 |
|                            | 2.62 | 0.000847 |
|                            | 2.79 | 0.000619 |
|                            | 2.79 | 0.000000 |
|                            | 2.81 | 0.001573 |
|                            | 2.91 | 0.040410 |
|                            | 2.95 | 0.036980 |
|                            | 3.02 | 0.000000 |
|                            | 3.03 | 0.000464 |
|                            | 3.04 | 0.000031 |
|                            | 3.05 | 0.000005 |
|                            | 3.05 | 0.010220 |
|                            | 3.11 | 0.001303 |
|                            | 3.13 | 0.000014 |
|                            | 3.15 | 0.000000 |
|                            | 3.16 | 0.006359 |
|                            | 3.17 | 0.001003 |
|                            | 3.23 | 0.003465 |
|                            | 3.33 | 0.000403 |
|                            | 3.34 | 0.004794 |

|  |      |          |
|--|------|----------|
|  | 3.34 | 0.000000 |
|  | 3.37 | 0.041770 |
|  | 3.38 | 0.018940 |
|  | 3.41 | 0.000127 |
|  | 3.41 | 0.000051 |
|  | 3.46 | 0.004273 |
|  | 3.48 | 0.000339 |
|  | 3.50 | 0.013510 |
|  | 3.52 | 0.000003 |
|  | 3.55 | 0.137600 |
|  | 3.60 | 0.000270 |
|  | 3.60 | 0.000003 |
|  | 3.61 | 0.053840 |
|  | 3.62 | 0.055870 |
|  | 3.71 | 0.000001 |
|  | 3.74 | 0.002764 |
|  | 3.75 | 0.022440 |
|  | 3.89 | 0.002835 |
|  | 3.90 | 0.000004 |
|  | 3.92 | 0.372500 |
|  | 3.96 | 0.000121 |
|  | 3.96 | 0.000001 |
|  | 3.97 | 0.085540 |
|  | 3.97 | 0.000276 |
|  | 4.03 | 0.003461 |
|  | 4.03 | 0.000003 |
|  | 4.03 | 0.003094 |
|  | 4.03 | 0.000888 |
|  | 4.09 | 0.000002 |
|  | 4.09 | 0.000125 |
|  | 4.10 | 0.009010 |
|  | 4.11 | 0.006814 |
|  | 4.12 | 0.000008 |

|  |      |          |
|--|------|----------|
|  | 4.12 | 0.000224 |
|  | 4.17 | 0.008800 |
|  | 4.21 | 0.164300 |
|  | 4.25 | 0.027530 |
|  | 4.25 | 0.000032 |
|  | 4.25 | 0.000014 |
|  | 4.26 | 0.001533 |
|  | 4.26 | 0.000038 |
|  | 4.26 | 0.000006 |
|  | 4.27 | 0.020310 |
|  | 4.33 | 0.000257 |
|  | 4.37 | 0.002119 |
|  | 4.37 | 0.000027 |
|  | 4.38 | 0.000008 |
|  | 4.38 | 0.006336 |
|  | 4.39 | 0.058010 |
|  | 4.41 | 0.089460 |
|  | 4.42 | 0.013060 |
|  | 4.42 | 0.000029 |
|  | 4.43 | 0.000052 |
|  | 4.45 | 0.090970 |
|  | 4.45 | 0.000100 |
|  | 4.45 | 0.002599 |
|  | 4.46 | 0.000067 |
|  | 4.50 | 0.000005 |
|  | 4.51 | 0.017420 |
|  | 4.51 | 0.000178 |
|  | 4.51 | 0.000019 |
|  | 4.53 | 0.013330 |
|  | 4.54 | 0.000072 |
|  | 4.55 | 0.000008 |
|  | 4.60 | 0.092780 |
|  | 4.61 | 0.069250 |

|  |      |          |
|--|------|----------|
|  | 4.66 | 0.024780 |
|  | 4.82 | 0.003680 |
|  | 4.82 | 0.000071 |
|  | 4.82 | 0.000036 |
|  | 4.83 | 0.011170 |
|  | 4.85 | 0.000073 |
|  | 4.85 | 0.000026 |
|  | 4.92 | 0.439000 |
|  | 4.94 | 0.007059 |
|  | 4.95 | 0.000019 |
|  | 4.95 | 0.012620 |
|  | 4.95 | 0.002787 |
|  | 4.96 | 0.000020 |
|  | 4.97 | 0.006038 |
|  | 4.97 | 0.000054 |
|  | 4.97 | 0.000025 |
|  | 4.97 | 0.009483 |
|  | 4.98 | 0.019000 |
|  | 4.99 | 0.000276 |
|  | 4.99 | 0.107700 |
|  | 5.00 | 0.000125 |
|  | 5.00 | 0.000221 |
|  | 5.01 | 0.053290 |
|  | 5.01 | 0.000330 |
|  | 5.03 | 0.011390 |
|  | 5.05 | 0.000069 |
|  | 5.05 | 0.024470 |
|  | 5.09 | 0.000011 |
|  | 5.11 | 0.051530 |
|  | 5.11 | 0.128700 |
|  | 5.14 | 0.000066 |
|  | 5.17 | 0.000001 |
|  | 5.19 | 0.001595 |



|  |      |          |
|--|------|----------|
|  | 5.22 | 0.007783 |
|  | 5.23 | 0.000451 |
|  | 5.24 | 0.000043 |
|  | 5.24 | 0.000033 |
|  | 5.25 | 0.000033 |
|  | 5.27 | 0.005651 |
|  | 5.27 | 0.000086 |
|  | 5.28 | 0.007540 |
|  | 5.29 | 0.000099 |
|  | 5.29 | 0.000010 |
|  | 5.29 | 0.019560 |
|  | 5.30 | 0.000077 |
|  | 5.31 | 0.004218 |
|  | 5.31 | 0.000106 |
|  | 5.32 | 0.000003 |
|  | 5.35 | 0.000314 |
|  | 5.37 | 0.024970 |
|  | 5.38 | 0.023870 |
|  | 5.40 | 0.000043 |
|  | 5.42 | 0.000005 |
|  | 5.43 | 0.002933 |
|  | 5.44 | 0.003506 |
|  | 5.45 | 0.063890 |
|  | 5.46 | 0.000179 |
|  | 5.46 | 0.086860 |
|  | 5.53 | 0.004981 |
|  | 5.56 | 0.037160 |
|  | 5.57 | 0.003140 |
|  | 5.57 | 0.001089 |
|  | 5.57 | 0.000019 |
|  | 5.57 | 0.000004 |
|  | 5.58 | 0.016620 |
|  | 5.60 | 0.031700 |

|  |      |          |
|--|------|----------|
|  | 5.63 | 0.000087 |
|  | 5.68 | 0.005970 |
|  | 5.71 | 0.000091 |
|  | 5.73 | 0.013310 |
|  | 5.80 | 0.000000 |
|  | 5.83 | 0.022260 |
|  | 5.91 | 0.000170 |

**Table S4.** TD-DFT/B3LYP transition energies (in eV) to the SO excited states of [Pt(ppy)Cl<sub>2</sub>]<sup>-</sup> **2**, [Pt(phbpyR)Cl] **4** and [Pt(dpybR)Cl] **5** (R = CH<sub>3</sub>) and associated oscillator strengths *f*.

|                                                 | transition energies | <i>f</i> |
|-------------------------------------------------|---------------------|----------|
| [Pt(ppy)Cl <sub>2</sub> ] <sup>-</sup> <b>2</b> | 2.64                | 0.000019 |
|                                                 | 2.64                | 0.000770 |
|                                                 | 2.65                | 0.000449 |
|                                                 | 2.87                | 0.022460 |
|                                                 | 2.88                | 0.000716 |
|                                                 | 2.89                | 0.006381 |
|                                                 | 2.92                | 0.002645 |
|                                                 | 2.94                | 0.002098 |
|                                                 | 2.96                | 0.000225 |
|                                                 | 3.02                | 0.021670 |
|                                                 | 3.07                | 0.017340 |
|                                                 | 3.09                | 0.000429 |
|                                                 | 3.16                | 0.036080 |
|                                                 | 3.23                | 0.000925 |
|                                                 | 3.27                | 0.000115 |
|                                                 | 3.30                | 0.010480 |
|                                                 | 3.32                | 0.021190 |
|                                                 | 3.33                | 0.001418 |
|                                                 | 3.38                | 0.000559 |
|                                                 | 3.49                | 0.000052 |
|                                                 | 3.49                | 0.001978 |

|  |      |          |
|--|------|----------|
|  | 3.49 | 0.002077 |
|  | 3.64 | 0.009734 |
|  | 3.65 | 0.000654 |
|  | 3.67 | 0.003272 |
|  | 3.68 | 0.035760 |
|  | 3.69 | 0.031130 |
|  | 3.73 | 0.008840 |
|  | 3.73 | 0.004040 |
|  | 3.74 | 0.000926 |
|  | 3.80 | 0.015380 |
|  | 3.82 | 0.002352 |
|  | 3.85 | 0.007229 |
|  | 3.85 | 0.051680 |
|  | 3.88 | 0.001113 |
|  | 3.89 | 0.057690 |
|  | 3.90 | 0.000682 |
|  | 3.91 | 0.013330 |
|  | 3.93 | 0.000968 |
|  | 3.94 | 0.000857 |
|  | 3.95 | 0.085010 |
|  | 4.07 | 0.020400 |
|  | 4.13 | 0.172700 |
|  | 4.13 | 0.000761 |
|  | 4.14 | 0.006143 |
|  | 4.14 | 0.028010 |
|  | 4.19 | 0.000694 |
|  | 4.21 | 0.140200 |
|  | 4.31 | 0.003682 |
|  | 4.31 | 0.039000 |
|  | 4.33 | 0.000704 |
|  | 4.34 | 0.016200 |
|  | 4.35 | 0.002779 |
|  | 4.42 | 0.003985 |

|  |      |          |
|--|------|----------|
|  | 4.42 | 0.000157 |
|  | 4.43 | 0.001407 |
|  | 4.44 | 0.001594 |
|  | 4.47 | 0.024350 |
|  | 4.52 | 0.000642 |
|  | 4.52 | 0.001567 |
|  | 4.53 | 0.000269 |
|  | 4.58 | 0.002763 |
|  | 4.59 | 0.000312 |
|  | 4.59 | 0.001792 |
|  | 4.60 | 0.002758 |
|  | 4.60 | 0.000514 |
|  | 4.61 | 0.009612 |
|  | 4.62 | 0.067750 |
|  | 4.65 | 0.120500 |
|  | 4.68 | 0.067340 |
|  | 4.69 | 0.005160 |
|  | 4.71 | 0.006120 |
|  | 4.72 | 0.120200 |
|  | 4.75 | 0.091630 |
|  | 4.82 | 0.006902 |
|  | 4.82 | 0.001194 |
|  | 4.84 | 0.011570 |
|  | 4.84 | 0.033980 |
|  | 4.87 | 0.010210 |
|  | 4.90 | 0.001873 |
|  | 4.91 | 0.004629 |
|  | 4.92 | 0.030090 |
|  | 4.99 | 0.001960 |
|  | 5.00 | 0.004980 |
|  | 5.00 | 0.000923 |
|  | 5.02 | 0.001693 |
|  | 5.02 | 0.003258 |

|  |      |          |
|--|------|----------|
|  | 5.02 | 0.010440 |
|  | 5.04 | 0.000391 |
|  | 5.05 | 0.000747 |
|  | 5.06 | 0.000342 |
|  | 5.10 | 0.000308 |
|  | 5.10 | 0.002778 |
|  | 5.11 | 0.001097 |
|  | 5.11 | 0.000228 |
|  | 5.12 | 0.001561 |
|  | 5.13 | 0.020250 |
|  | 5.15 | 0.000244 |
|  | 5.16 | 0.007813 |
|  | 5.23 | 0.000710 |
|  | 5.23 | 0.006217 |
|  | 5.25 | 0.000293 |
|  | 5.29 | 0.068360 |
|  | 5.30 | 0.060280 |
|  | 5.33 | 0.000514 |
|  | 5.33 | 0.002826 |
|  | 5.34 | 0.001151 |
|  | 5.36 | 0.041590 |
|  | 5.38 | 0.000539 |
|  | 5.40 | 0.000810 |
|  | 5.40 | 0.004968 |
|  | 5.41 | 0.018790 |
|  | 5.43 | 0.003486 |
|  | 5.43 | 0.000814 |
|  | 5.44 | 0.000559 |
|  | 5.45 | 0.001952 |
|  | 5.46 | 0.000151 |
|  | 5.46 | 0.003160 |
|  | 5.50 | 0.002924 |
|  | 5.50 | 0.022040 |

|  |      |          |
|--|------|----------|
|  | 5.51 | 0.000959 |
|  | 5.51 | 0.021890 |
|  | 5.54 | 0.020840 |
|  | 5.56 | 0.001587 |
|  | 5.57 | 0.001370 |
|  | 5.58 | 0.004945 |
|  | 5.58 | 0.000783 |
|  | 5.59 | 0.003555 |
|  | 5.59 | 0.005993 |
|  | 5.60 | 0.007465 |
|  | 5.60 | 0.000131 |
|  | 5.61 | 0.000968 |
|  | 5.63 | 0.001076 |
|  | 5.64 | 0.032800 |
|  | 5.66 | 0.000514 |
|  | 5.67 | 0.002905 |
|  | 5.67 | 0.001207 |
|  | 5.68 | 0.005034 |
|  | 5.69 | 0.018410 |
|  | 5.69 | 0.004691 |
|  | 5.72 | 0.064440 |
|  | 5.74 | 0.000956 |
|  | 5.75 | 0.002038 |
|  | 5.76 | 0.015900 |
|  | 5.81 | 0.002814 |
|  | 5.82 | 0.091790 |
|  | 5.85 | 0.130000 |
|  | 5.86 | 0.136800 |
|  | 5.91 | 0.028530 |
|  | 5.92 | 0.004052 |
|  | 5.94 | 0.039630 |
|  | 5.94 | 0.007063 |
|  | 5.95 | 0.006752 |

|                         |      |          |
|-------------------------|------|----------|
|                         | 5.96 | 0.111300 |
|                         | 5.98 | 0.001543 |
|                         | 6.00 | 0.156600 |
|                         | 6.05 | 0.021070 |
|                         | 6.07 | 0.013830 |
|                         | 6.15 | 0.091130 |
|                         | 6.21 | 0.006439 |
| [Pt(phbpyR)Cl] <b>4</b> | 2.40 | 0.000069 |
|                         | 2.40 | 0.000226 |
|                         | 2.41 | 0.000337 |
|                         | 2.50 | 0.000584 |
|                         | 2.51 | 0.000068 |
|                         | 2.54 | 0.001254 |
|                         | 2.58 | 0.004491 |
|                         | 2.75 | 0.026920 |
|                         | 2.81 | 0.000072 |
|                         | 2.82 | 0.001513 |
|                         | 2.82 | 0.000188 |
|                         | 3.02 | 0.001126 |
|                         | 3.03 | 0.000575 |
|                         | 3.05 | 0.001219 |
|                         | 3.14 | 0.008892 |
|                         | 3.22 | 0.000156 |
|                         | 3.22 | 0.041790 |
|                         | 3.24 | 0.002023 |
|                         | 3.28 | 0.108100 |
|                         | 3.29 | 0.000118 |
|                         | 3.30 | 0.016830 |
|                         | 3.30 | 0.001260 |
|                         | 3.33 | 0.030710 |
|                         | 3.37 | 0.081270 |
|                         | 3.39 | 0.000058 |
|                         | 3.43 | 0.000859 |

|  |      |          |
|--|------|----------|
|  | 3.45 | 0.018590 |
|  | 3.47 | 0.000078 |
|  | 3.48 | 0.008266 |
|  | 3.51 | 0.000045 |
|  | 3.51 | 0.011440 |
|  | 3.52 | 0.000143 |
|  | 3.53 | 0.000984 |
|  | 3.54 | 0.037580 |
|  | 3.56 | 0.014490 |
|  | 3.67 | 0.265400 |
|  | 3.71 | 0.000058 |
|  | 3.72 | 0.000067 |
|  | 3.73 | 0.004725 |
|  | 3.74 | 0.000092 |
|  | 3.75 | 0.038920 |
|  | 3.78 | 0.000366 |
|  | 3.81 | 0.002689 |
|  | 3.82 | 0.000207 |
|  | 3.84 | 0.001071 |
|  | 3.85 | 0.043960 |
|  | 3.90 | 0.000094 |
|  | 3.90 | 0.005303 |
|  | 3.90 | 0.000185 |
|  | 3.93 | 0.072150 |
|  | 3.95 | 0.000006 |
|  | 3.95 | 0.000060 |
|  | 3.96 | 0.072500 |
|  | 4.03 | 0.054380 |
|  | 4.05 | 0.044740 |
|  | 4.06 | 0.000173 |
|  | 4.06 | 0.000211 |
|  | 4.09 | 0.052450 |
|  | 4.11 | 0.000310 |



|  |      |          |
|--|------|----------|
|  | 4.12 | 0.000584 |
|  | 4.12 | 0.036600 |
|  | 4.16 | 0.002086 |
|  | 4.17 | 0.000036 |
|  | 4.17 | 0.000032 |
|  | 4.17 | 0.006967 |
|  | 4.19 | 0.000061 |
|  | 4.23 | 0.000035 |
|  | 4.27 | 0.176000 |
|  | 4.33 | 0.000075 |
|  | 4.33 | 0.005403 |
|  | 4.35 | 0.000037 |
|  | 4.36 | 0.003301 |
|  | 4.36 | 0.000073 |
|  | 4.36 | 0.000039 |
|  | 4.42 | 0.023820 |
|  | 4.44 | 0.022500 |
|  | 4.45 | 0.000029 |
|  | 4.47 | 0.205400 |
|  | 4.49 | 0.050380 |
|  | 4.50 | 0.000387 |
|  | 4.51 | 0.053440 |
|  | 4.54 | 0.052170 |
|  | 4.55 | 0.000049 |
|  | 4.56 | 0.008294 |
|  | 4.58 | 0.000043 |
|  | 4.61 | 0.000072 |
|  | 4.62 | 0.009115 |
|  | 4.62 | 0.000066 |
|  | 4.63 | 0.037740 |
|  | 4.64 | 0.000156 |
|  | 4.69 | 0.013680 |
|  | 4.69 | 0.000107 |

|  |      |          |
|--|------|----------|
|  | 4.71 | 0.000171 |
|  | 4.72 | 0.035090 |
|  | 4.73 | 0.000171 |
|  | 4.76 | 0.070350 |
|  | 4.77 | 0.000102 |
|  | 4.78 | 0.000141 |
|  | 4.79 | 0.054910 |
|  | 4.80 | 0.030060 |
|  | 4.82 | 0.035960 |
|  | 4.82 | 0.001474 |
|  | 4.83 | 0.000311 |
|  | 4.86 | 0.004314 |
|  | 4.86 | 0.000100 |
|  | 4.87 | 0.000135 |
|  | 4.91 | 0.028240 |
|  | 4.95 | 0.009724 |
|  | 4.96 | 0.000913 |
|  | 4.96 | 0.000136 |
|  | 4.98 | 0.065420 |
|  | 5.00 | 0.005316 |
|  | 5.01 | 0.000140 |
|  | 5.01 | 0.000224 |
|  | 5.04 | 0.137300 |
|  | 5.07 | 0.000223 |
|  | 5.07 | 0.025450 |
|  | 5.07 | 0.018320 |
|  | 5.08 | 0.000079 |
|  | 5.13 | 0.000725 |
|  | 5.14 | 0.028040 |
|  | 5.15 | 0.012410 |
|  | 5.15 | 0.000037 |
|  | 5.17 | 0.035460 |
|  | 5.18 | 0.000307 |

|  |      |          |
|--|------|----------|
|  | 5.21 | 0.000552 |
|  | 5.21 | 0.130700 |
|  | 5.23 | 0.000562 |
|  | 5.23 | 0.018580 |
|  | 5.24 | 0.032830 |
|  | 5.26 | 0.001328 |
|  | 5.27 | 0.023720 |
|  | 5.29 | 0.014440 |
|  | 5.29 | 0.001332 |
|  | 5.29 | 0.001514 |
|  | 5.30 | 0.006581 |
|  | 5.31 | 0.000251 |
|  | 5.31 | 0.006344 |
|  | 5.32 | 0.009559 |
|  | 5.33 | 0.004991 |
|  | 5.33 | 0.000358 |
|  | 5.34 | 0.000347 |
|  | 5.38 | 0.001766 |
|  | 5.38 | 0.028670 |
|  | 5.39 | 0.000271 |
|  | 5.39 | 0.082980 |
|  | 5.40 | 0.000856 |
|  | 5.43 | 0.027150 |
|  | 5.45 | 0.000672 |
|  | 5.47 | 0.004089 |
|  | 5.50 | 0.019330 |
|  | 5.54 | 0.058950 |
|  | 5.57 | 0.006892 |
|  | 5.62 | 0.064120 |
|  | 5.66 | 0.000934 |
|  | 5.69 | 0.039770 |
|  | 5.70 | 0.069260 |
|  | 5.70 | 0.004638 |

|                                                  |      |          |
|--------------------------------------------------|------|----------|
|                                                  | 5.74 | 0.006997 |
|                                                  | 5.76 | 0.088040 |
| [Pt(dpybR)Cl] <b>5</b><br>(R = CH <sub>3</sub> ) | 2.60 | 0.000003 |
|                                                  | 2.60 | 0.000222 |
|                                                  | 2.61 | 0.000155 |
|                                                  | 2.69 | 0.000022 |
|                                                  | 2.69 | 0.000000 |
|                                                  | 2.70 | 0.000181 |
|                                                  | 2.95 | 0.002757 |
|                                                  | 2.96 | 0.000000 |
|                                                  | 2.97 | 0.000079 |
|                                                  | 2.97 | 0.001702 |
|                                                  | 3.00 | 0.000001 |
|                                                  | 3.01 | 0.001055 |
|                                                  | 3.05 | 0.001301 |
|                                                  | 3.06 | 0.075260 |
|                                                  | 3.19 | 0.016480 |
|                                                  | 3.41 | 0.013250 |
|                                                  | 3.42 | 0.000059 |
|                                                  | 3.43 | 0.000016 |
|                                                  | 3.43 | 0.002971 |
|                                                  | 3.48 | 0.000000 |
|                                                  | 3.50 | 0.001176 |
|                                                  | 3.52 | 0.000630 |
|                                                  | 3.56 | 0.000000 |
|                                                  | 3.60 | 0.002450 |
|                                                  | 3.60 | 0.001210 |
|                                                  | 3.61 | 0.001390 |
|                                                  | 3.66 | 0.000187 |
|                                                  | 3.68 | 0.000001 |
|                                                  | 3.70 | 0.002116 |
|                                                  | 3.70 | 0.001372 |

|  |      |          |
|--|------|----------|
|  | 3.72 | 0.000000 |
|  | 3.77 | 0.000986 |
|  | 3.78 | 0.000059 |
|  | 3.78 | 0.013110 |
|  | 3.82 | 0.016930 |
|  | 3.82 | 0.000002 |
|  | 3.82 | 0.001294 |
|  | 3.83 | 0.000204 |
|  | 3.83 | 0.002646 |
|  | 3.84 | 0.000004 |
|  | 3.84 | 0.000608 |
|  | 3.86 | 0.008773 |
|  | 3.87 | 0.010190 |
|  | 3.91 | 0.000001 |
|  | 3.92 | 0.000428 |
|  | 3.94 | 0.000643 |
|  | 3.96 | 0.002589 |
|  | 3.97 | 0.000001 |
|  | 3.98 | 0.000489 |
|  | 3.99 | 0.009936 |
|  | 4.00 | 0.000205 |
|  | 4.07 | 0.000041 |
|  | 4.13 | 0.051830 |
|  | 4.13 | 0.017650 |
|  | 4.15 | 0.013270 |
|  | 4.16 | 0.000005 |
|  | 4.16 | 0.000271 |
|  | 4.17 | 0.002656 |
|  | 4.18 | 0.001685 |
|  | 4.18 | 0.000001 |
|  | 4.18 | 0.000073 |
|  | 4.22 | 0.000457 |
|  | 4.22 | 0.000007 |

|  |      |          |
|--|------|----------|
|  | 4.24 | 0.048150 |
|  | 4.30 | 0.085090 |
|  | 4.35 | 0.000002 |
|  | 4.35 | 0.000077 |
|  | 4.36 | 0.008985 |
|  | 4.37 | 0.000004 |
|  | 4.37 | 0.000083 |
|  | 4.38 | 0.036070 |
|  | 4.39 | 0.027610 |
|  | 4.41 | 0.001024 |
|  | 4.42 | 0.000013 |
|  | 4.42 | 0.000290 |
|  | 4.46 | 0.000021 |
|  | 4.46 | 0.000004 |
|  | 4.51 | 0.056490 |
|  | 4.51 | 0.024280 |
|  | 4.52 | 0.000007 |
|  | 4.53 | 0.006945 |
|  | 4.57 | 0.000034 |
|  | 4.58 | 0.000001 |
|  | 4.59 | 0.008740 |
|  | 4.60 | 0.003422 |
|  | 4.60 | 0.000095 |
|  | 4.61 | 0.060790 |
|  | 4.64 | 0.012180 |
|  | 4.71 | 0.000002 |
|  | 4.72 | 0.000184 |
|  | 4.73 | 0.002290 |
|  | 4.73 | 0.000044 |
|  | 4.76 | 0.000030 |
|  | 4.76 | 0.000006 |
|  | 4.78 | 0.025290 |
|  | 4.79 | 0.005336 |

|  |      |          |
|--|------|----------|
|  | 4.80 | 0.000242 |
|  | 4.80 | 0.001597 |
|  | 4.81 | 0.004075 |
|  | 4.81 | 0.000168 |
|  | 4.82 | 0.000078 |
|  | 4.82 | 0.002327 |
|  | 4.85 | 0.000166 |
|  | 4.89 | 0.000363 |
|  | 4.93 | 0.000822 |
|  | 4.93 | 0.000075 |
|  | 4.93 | 0.004257 |
|  | 4.94 | 0.000221 |
|  | 4.95 | 0.013540 |
|  | 4.95 | 0.000094 |
|  | 4.96 | 0.003218 |
|  | 4.97 | 0.047850 |
|  | 4.97 | 0.020900 |
|  | 5.00 | 0.002058 |
|  | 5.00 | 0.000073 |
|  | 5.00 | 0.000071 |
|  | 5.06 | 0.116100 |
|  | 5.06 | 0.005670 |
|  | 5.08 | 0.000057 |
|  | 5.10 | 0.064000 |
|  | 5.10 | 0.001080 |
|  | 5.10 | 0.008547 |
|  | 5.14 | 0.007894 |
|  | 5.15 | 0.000023 |
|  | 5.15 | 0.000066 |
|  | 5.17 | 0.045050 |
|  | 5.17 | 0.000328 |
|  | 5.20 | 0.000009 |
|  | 5.21 | 0.006986 |

|  |      |          |
|--|------|----------|
|  | 5.21 | 0.000009 |
|  | 5.22 | 0.003665 |
|  | 5.22 | 0.014380 |
|  | 5.24 | 0.000135 |
|  | 5.25 | 0.011220 |
|  | 5.25 | 0.050420 |
|  | 5.25 | 0.004854 |
|  | 5.27 | 0.000024 |
|  | 5.28 | 0.000004 |
|  | 5.29 | 0.000128 |
|  | 5.33 | 0.000002 |
|  | 5.33 | 0.000003 |
|  | 5.36 | 0.011970 |
|  | 5.39 | 0.000038 |
|  | 5.39 | 0.000034 |
|  | 5.39 | 0.068000 |
|  | 5.41 | 0.005260 |
|  | 5.41 | 0.016170 |
|  | 5.43 | 0.000112 |
|  | 5.44 | 0.000004 |
|  | 5.48 | 0.076810 |
|  | 5.51 | 0.000003 |
|  | 5.51 | 0.000026 |
|  | 5.53 | 0.259700 |
|  | 5.54 | 0.066910 |
|  | 5.63 | 0.028160 |
|  | 5.63 | 0.000378 |
|  | 5.65 | 0.003724 |
|  | 5.72 | 0.001812 |
|  | 5.73 | 0.057530 |
|  | 5.77 | 0.021600 |



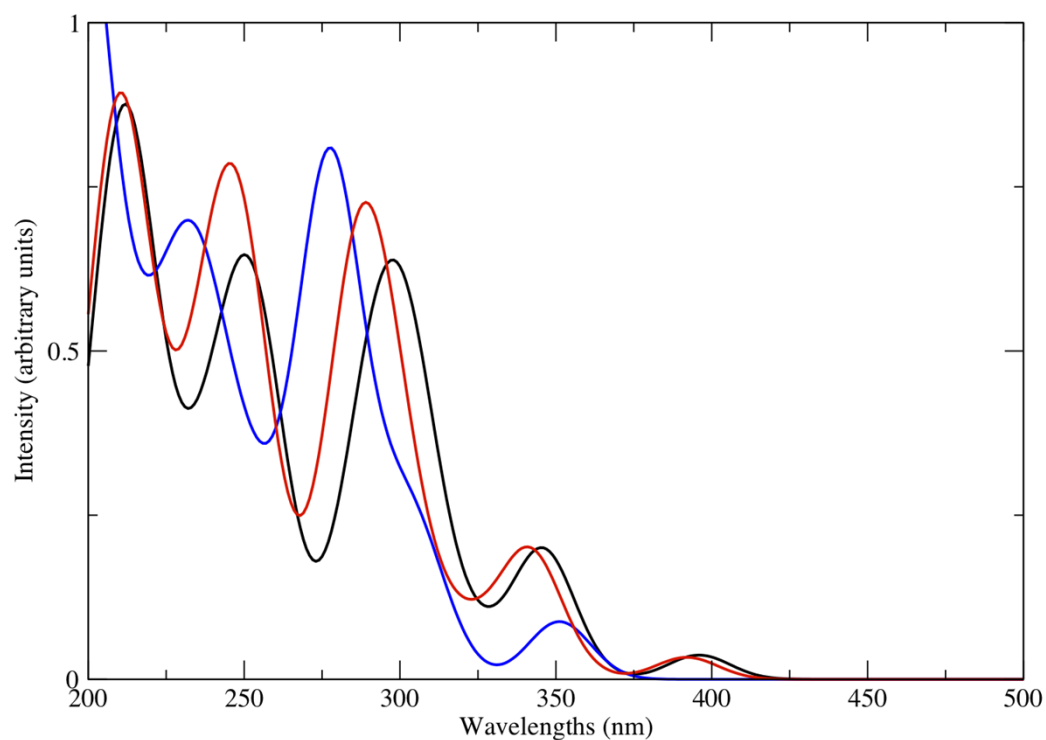

**Figure S1.** Comparison between the “scalar” TD-DFT theoretical absorption spectra of [Pt(ppy)Cl<sub>2</sub>]<sup>-</sup> **2** using B3LYP (in black), CAM-B3LYP (in blue) and B3LYP with TDA (in red).

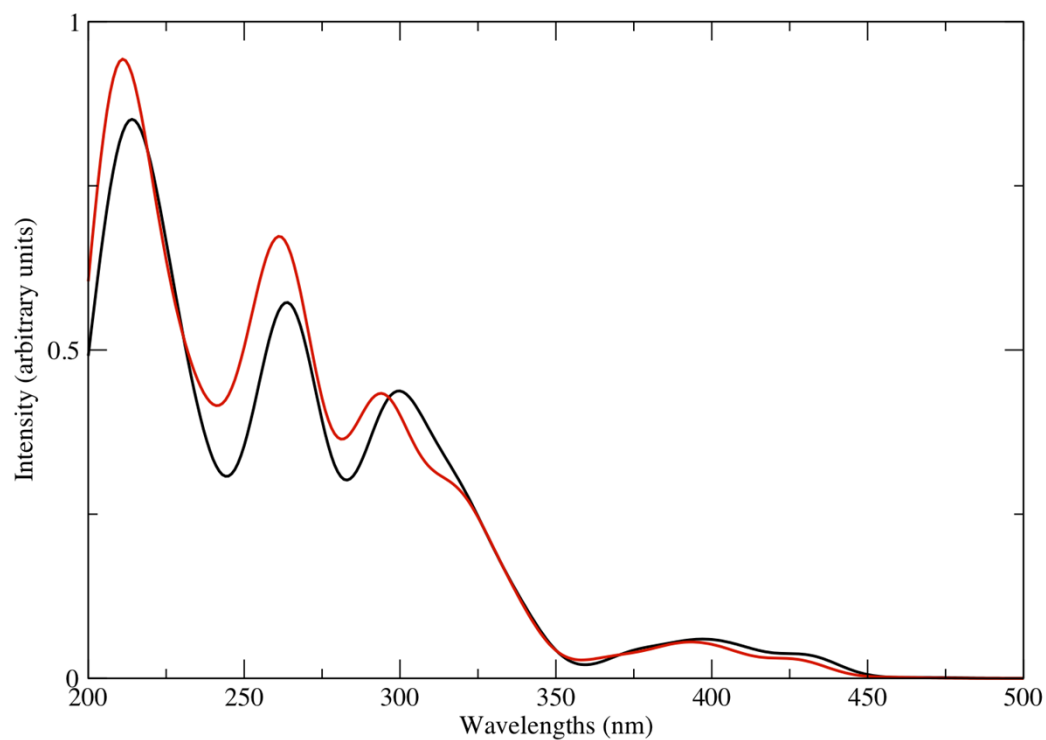

**Figure S2.** Comparison between the TD-DFT theoretical absorption spectra of [Pt(ppy)Cl<sub>2</sub>]<sup>-</sup> **2** with SOC computed with B3LYP (in black) and B3LYP with TDA (in red).
